# Supplementary material for: Energy Landscape of Conformational Changes for a Single Unmodified Protein
Source: Research Square preprint supplement (doi:10.21203/rs.3.rs-4921056/v1), 2024-09-13
Supplement: Supplementary file 1 [file e7fc9769a850f59e9d46a714.pdf]

# Supplementary Information: Energy Landscape of Conformational Changes for a Single Unmodified Protein

**Matthew Peters<sup>1,2</sup>, Tianyu Zhao<sup>1,2</sup>, Sherin George<sup>1,2</sup>, Viet Giang Truong<sup>3</sup>, Síle Nic Chormaic<sup>3</sup>, Cuifeng Ying<sup>4</sup>, René A. Nome<sup>5</sup>, and Reuven Gordon<sup>1,2,\*</sup>**

<sup>1</sup>Department of Electrical Engineering, University of Victoria, Victoria, V8W 2Y2, British Columbia, Canada

<sup>2</sup>Center for Advanced Material & Related Technologies, University of Victoria, Victoria, V8W 2Y2, British Columbia, Canada

<sup>3</sup>Okinawa Institute of Science and Technology Graduate University, Onna, Okinawa, 904-0495, Japan

<sup>4</sup>Advanced Optics and Photonics Laboratory, Department of Engineering, School of Science & Technology, Nottingham Trent University, Nottingham Trent, NG11 8NS, England

<sup>5</sup>Institute of Chemistry, State University of Campinas, Campinas, Brazil

\*rgordon@uvic.ca

## ABSTRACT

COMSOL simulations, polarizability of a single protein, trapping events and energy landscapes,  $F \leftrightarrow E$  pathways thermodynamics, plasmon enhanced imaging, state recognition.

## 1 COMSOL simulations

COMSOL simulations of the local heating in a DNH illuminated by a 980 nm laser with 1 mW intensity show the gold thickness dependence on heating in Fig. SI-1a. Fig. SI-1b shows the temperature increase for increasing laser power for a 70 nm gold film illuminated by a 980 nm laser.

We used a commercial finite element modeling COMSOL 6.0 package for the simulations. A 3D model was established to solve the electromagnetic (EM) and heat transfer (HT) problems. The modeling process was governed by differential equations describing the full-wave EM and HT physics, and their coupling phenomena. The 3D EM domain was set at  $2.0 \times 2.0 \times 2.0 \mu\text{m}$  cube, consisting of a single DNH at the center of the unit cell, and illuminating the water-side by a laser with a Gaussian intensity distribution. The focal-spot radius was set at  $w_0 = 0.61\lambda/NA$ , where  $\lambda$  was the wavelength of the incident laser light and  $NA = 1.25$  was the numerical aperture of the focusing objective lens. Scattering boundary conditions were used on all outer EM domain's boundaries. This scattering boundary allowed EM radiation to propagate out of the EM domain without reflection. Subsequently, this full-EM domain was placed inside a larger  $100 \times 100 \times 40 \mu\text{m}$  (Width, Depth, Height) HT domain. A prescribed ambient temperature of 293.15 K was set at the HT boundaries for solving the heat transfer physics.

The input Gaussian beam was polarized parallel to the y-direction. The distribution of the electric field (E-field) was calculated by solving numerically the scattering problem using the time-independent Maxwell's vector wave equation. Once the E-field distribution in the full-EM domain was found, the heat source density was then obtained by  $q_i(\mathbf{r}) = 1/2\text{Re}[\mathbf{J} \cdot \mathbf{E}^*]$ , where  $\mathbf{J}$  is induced-current density,  $\text{Re}$  represents the real part, and  $*$  is the complex conjugate. Finally, the total heat power,  $Q_{\text{tot}} = \oint q_i(\mathbf{r})d^3\mathbf{r}$ , was observed by taking the sum of the heat power generated by each mesh element, and serves as a total power dissipation heat over the 3D volume of the coupled EM and HT modeling system. The model required 0.55 TB of memory to perform the calculation. Calculation of each thermal heating data point took approximately 5 hours of machine time on the OIST Graduate University computing cluster.

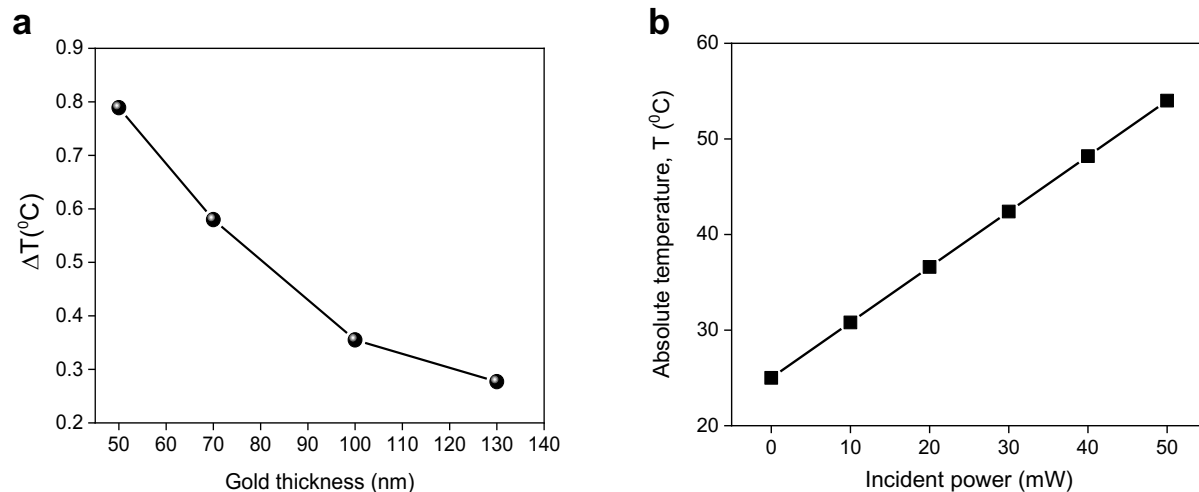

**Figure SI-1.** (a) Change in local temperature for different gold film thicknesses for an incident 980 nm laser with 1 mW power. (b) Absolute local temperature for increasing incident laser power for 70 nm thick gold film.

## 2 Polarizability measurement of a single protein

The polarizability of the trapped protein can be obtained by via a calibration curve of known polarizabilities and the experimental root mean square deviation of the trap signal. Fig. SI-2a shows the polarizabilities of the monomeric form of BSA. Fig. SI-2b shows the values for the dimeric form. Tab. SI-1 shows the calculated and extracted polarizability values.

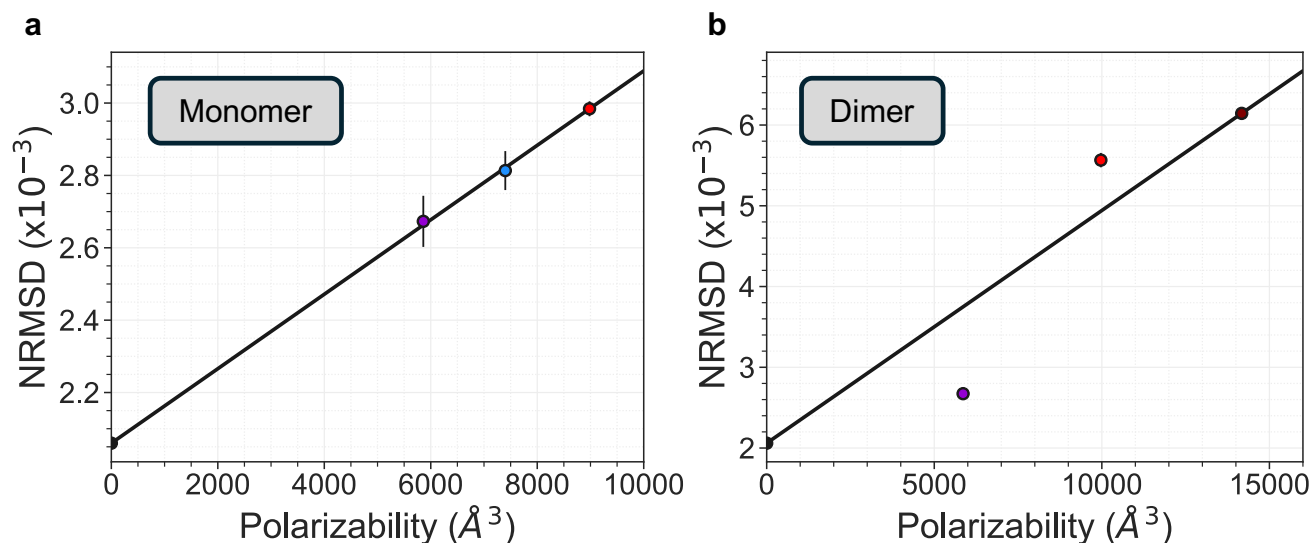

**Figure SI-2.** Normalized root mean square deviation of the trapping laser signal as a function of polarizability for (a) monomer (black: laser, purple: N, blue: F, and red: E) and (b) dimer (black: laser, purple: N, red: C, maroon: O).

**Table SI-1.** Polarizability calculation for monomer and dimer conformations from trapping signal RMSD values.

| Conformation | RMSD ( $\times 10^{-3}$ ) | Calculated Polarizability ( $^3$ ) | Extracted Polarizability ( $^3$ ) |
|--------------|---------------------------|------------------------------------|-----------------------------------|
| Laser        | $2.06 \pm 0.011$          | 0                                  | 0                                 |
| N            | $2.67 \pm 0.050$          | 5860                               | $5958 \pm 686$                    |
| F            | $2.81 \pm 0.049$          | 7400                               | $7322 \pm 523$                    |
| E            | $2.98 \pm 0.019$          |                                    | $8982 \pm 201$                    |
| C            | $5.57 \pm 0.086$          | 9971                               |                                   |
| O            | $6.14 \pm 0.049$          |                                    | $14173 \pm 4329$                  |

### 3 Trapping events

Segments of the energy landscape used for obtaining curvatures for the N, F, and E-wells as well as the NF and FE barriers are shown for each temperature in Fig. [SI-3](#).

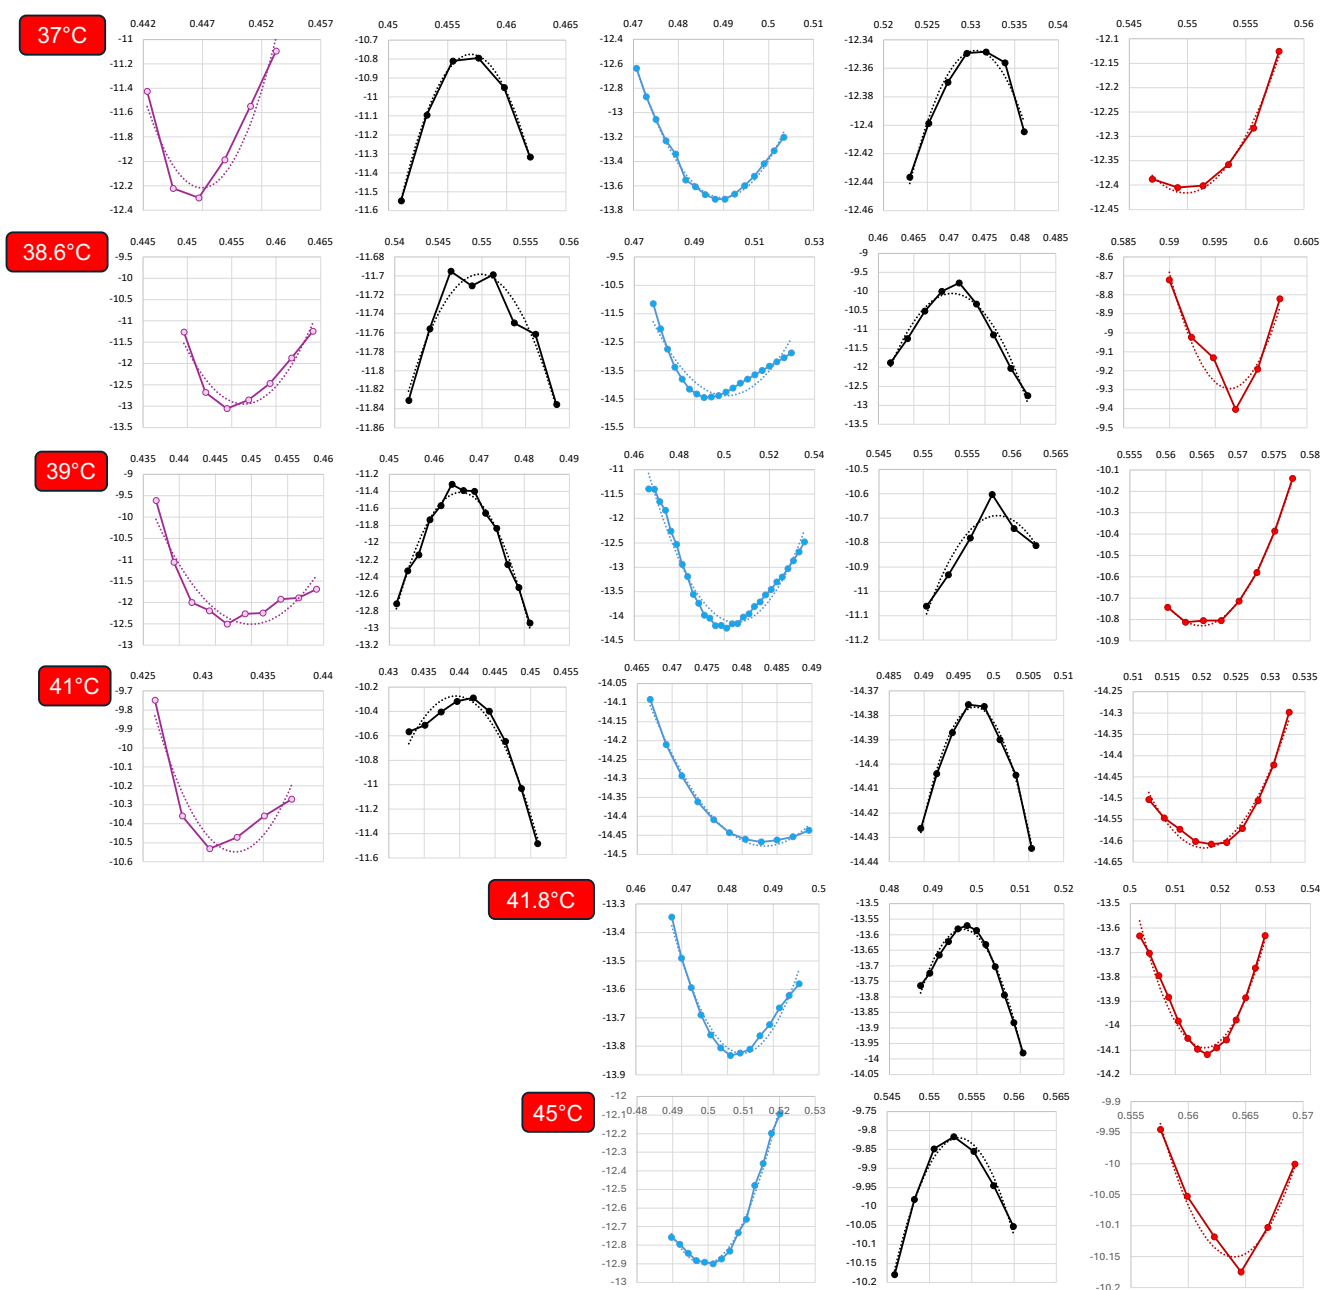

**Figure SI-3.** Segments of energy landscapes used for curvature measurements. Solid line is the energy landscape, dotted line is a second order polynomial fit.

All trapping events of unlabelled BSA and the corresponding energy landscapes with varying PSF widths are shown in Fig. SI-4.

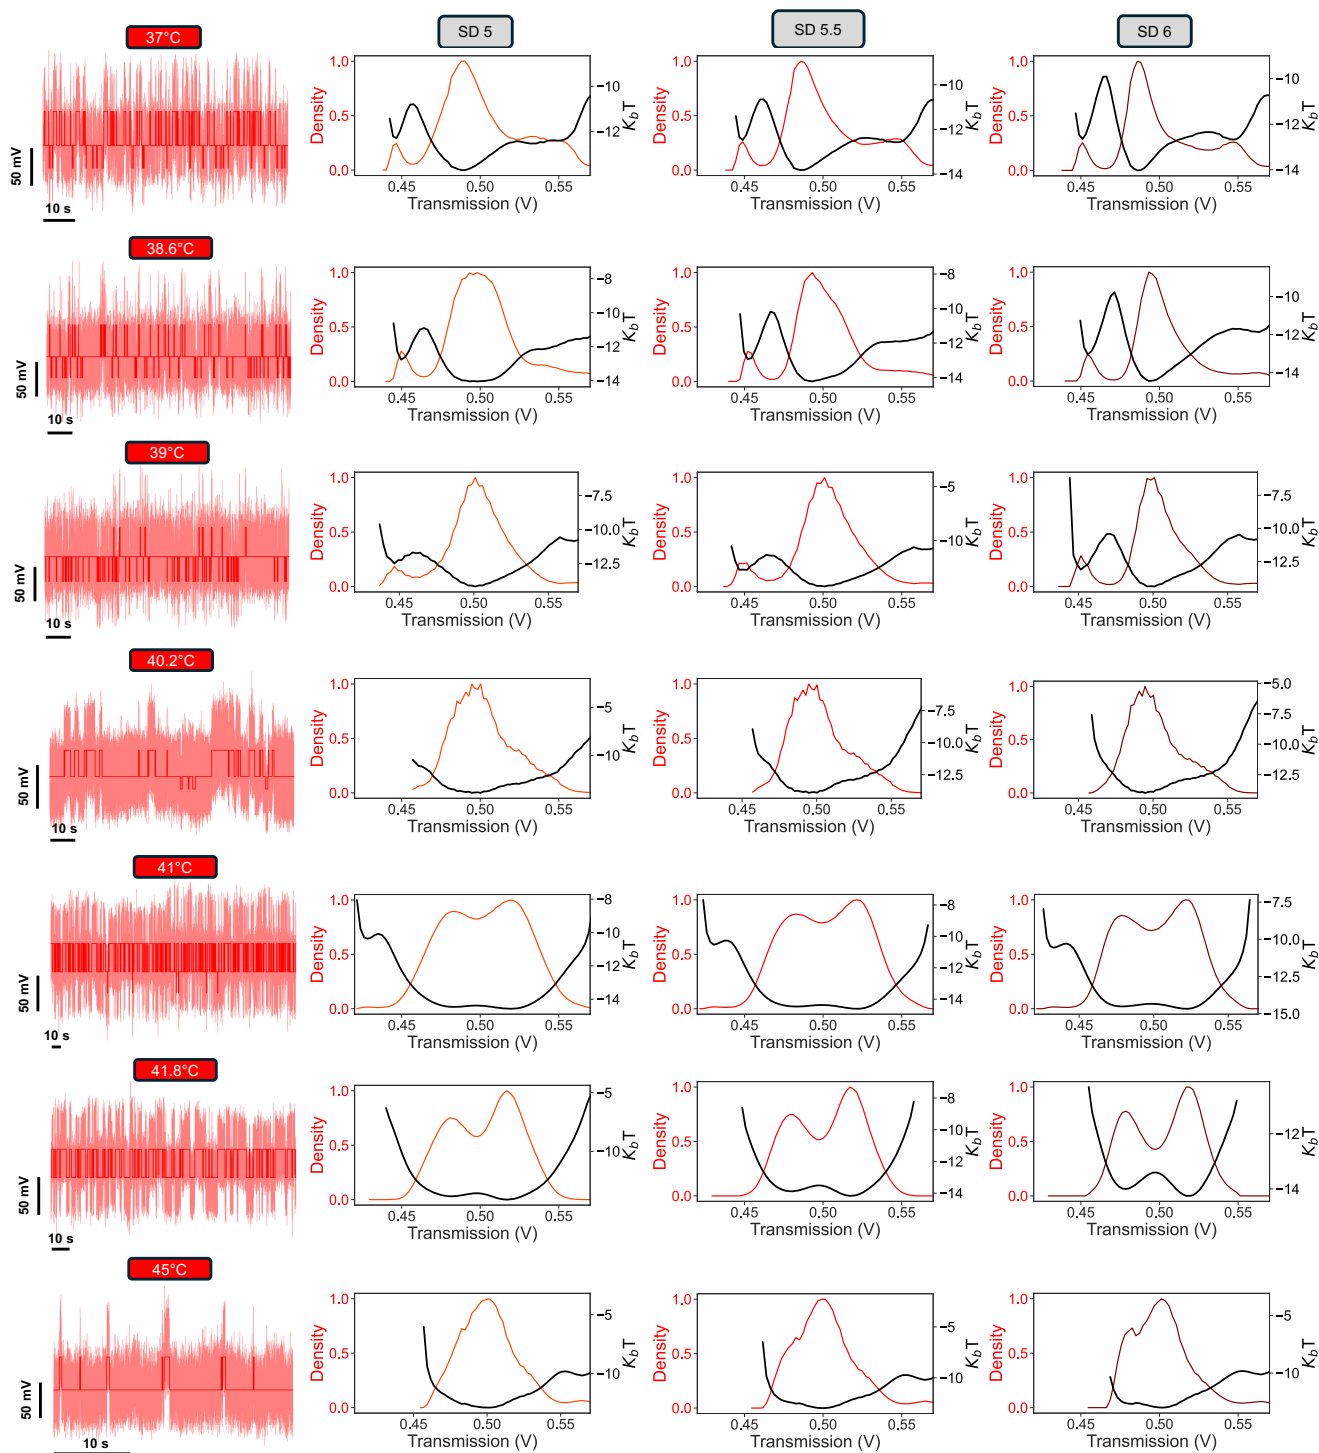

**Figure SI-4.** Trapping events and energy landscapes with varying point spread function widths

## 4 Fluorescent label impact

The thermodynamic parameters for labelled and unlabelled BSA for the  $F \leftrightarrow E$  pathway is shown in Fig. SI-5.

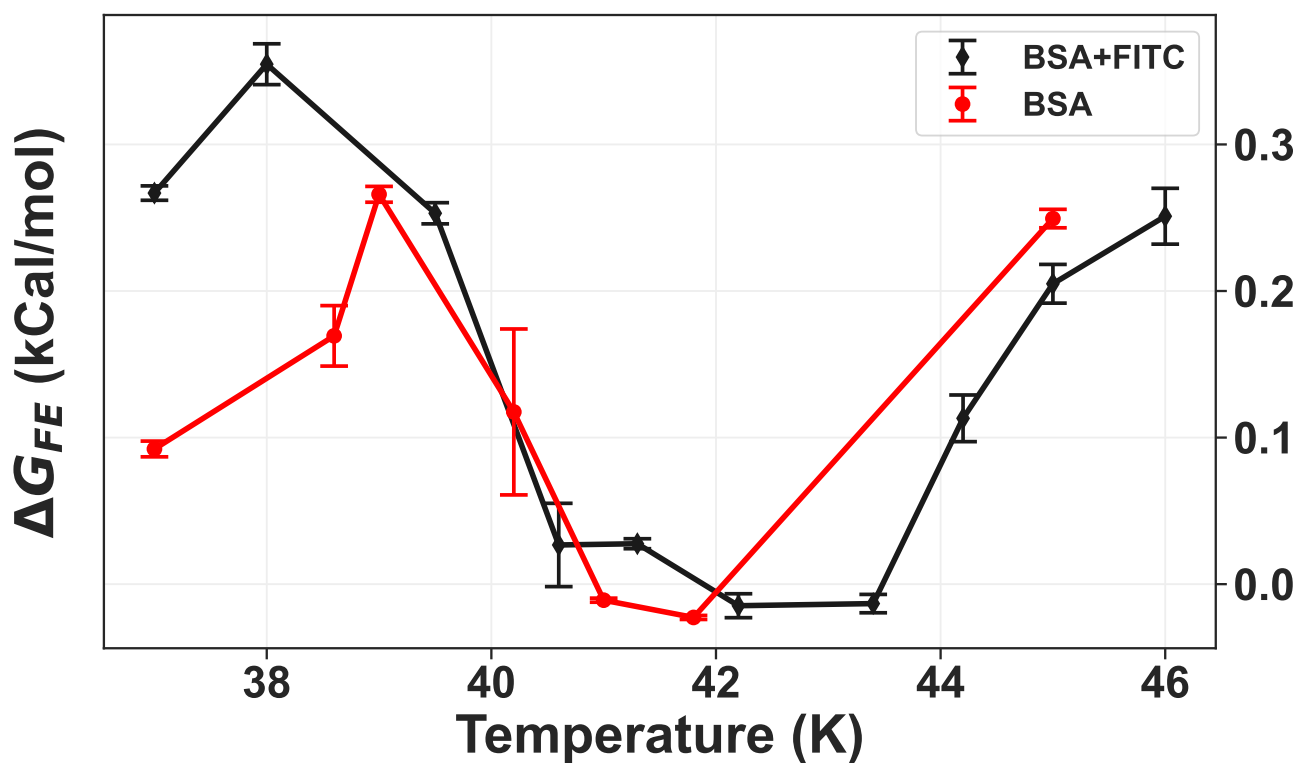

**Figure SI-5.** Change in Gibbs free energy for labelled and unlabelled BSA for the F $\leftrightarrow$ E pathway.

## 5 Plasmon enhanced imaging

Previous work has shown that the plasmonic field can provide an enhanced interferometric signal able to image single proteins as they approach the trap and when trapped. Dimer formation is visible in the video information, a monomeric BSA can be seen entering the trap (as verified by corner frequency measurements of APD signal) and a second monomeric BSA is tracked entering the trap. The APD traces of this event are shown in Fig. 3a while the video tracking is shown in Fig. [SI-6](#).

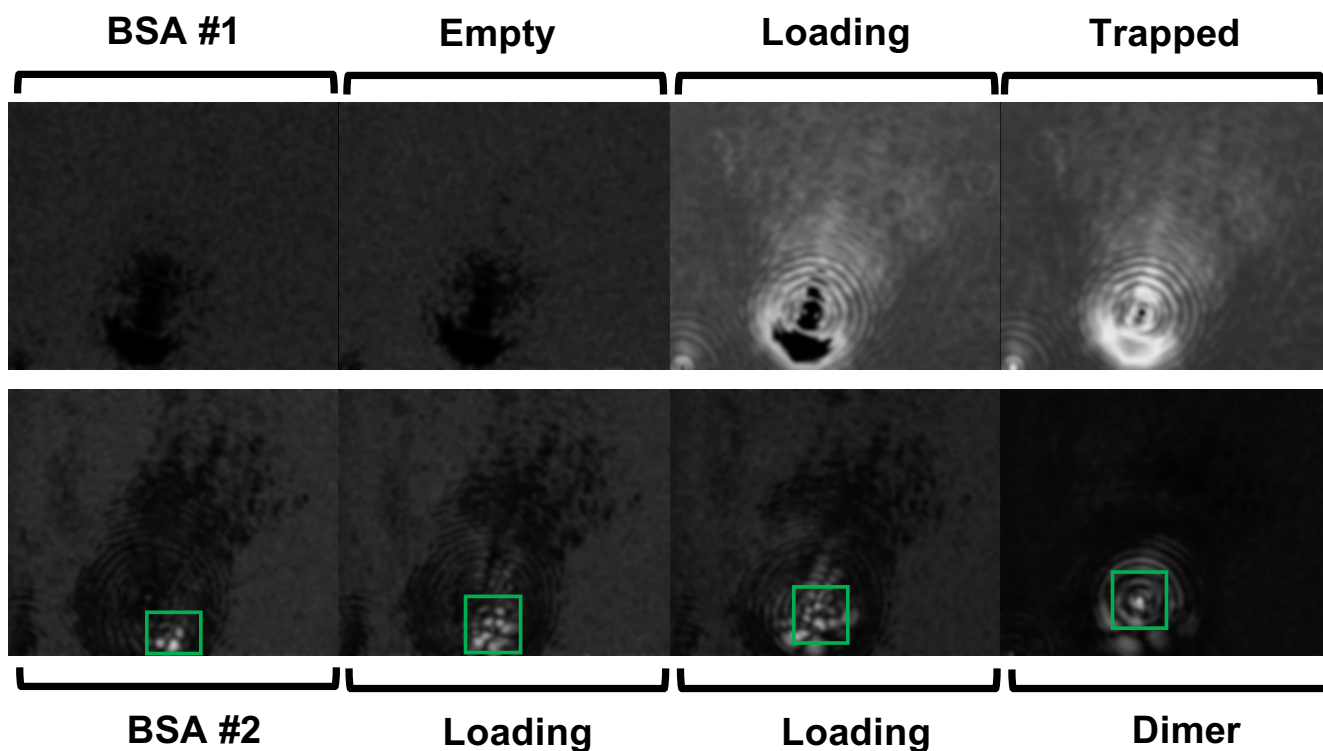

**Figure SI-6.** Differential imaging of monomeric BSA being trapped, followed by a second BSA being trapped, forming a dimer.

Here we show that once trapped, the intensity of the reflected light can be used to “see” the conformational changes. The intensity of a single pixel from the center of the frame is recorded over time and synced with the APD. Fig. SI-7 shows that despite a more than  $6000\times$  slower sampling rate, the general “picture” of the conformational landscape is preserved in the light intensity. While faster dynamics such as transition times and failed transitions are inaccessible, this should be resolvable with a sufficiently high speed camera.

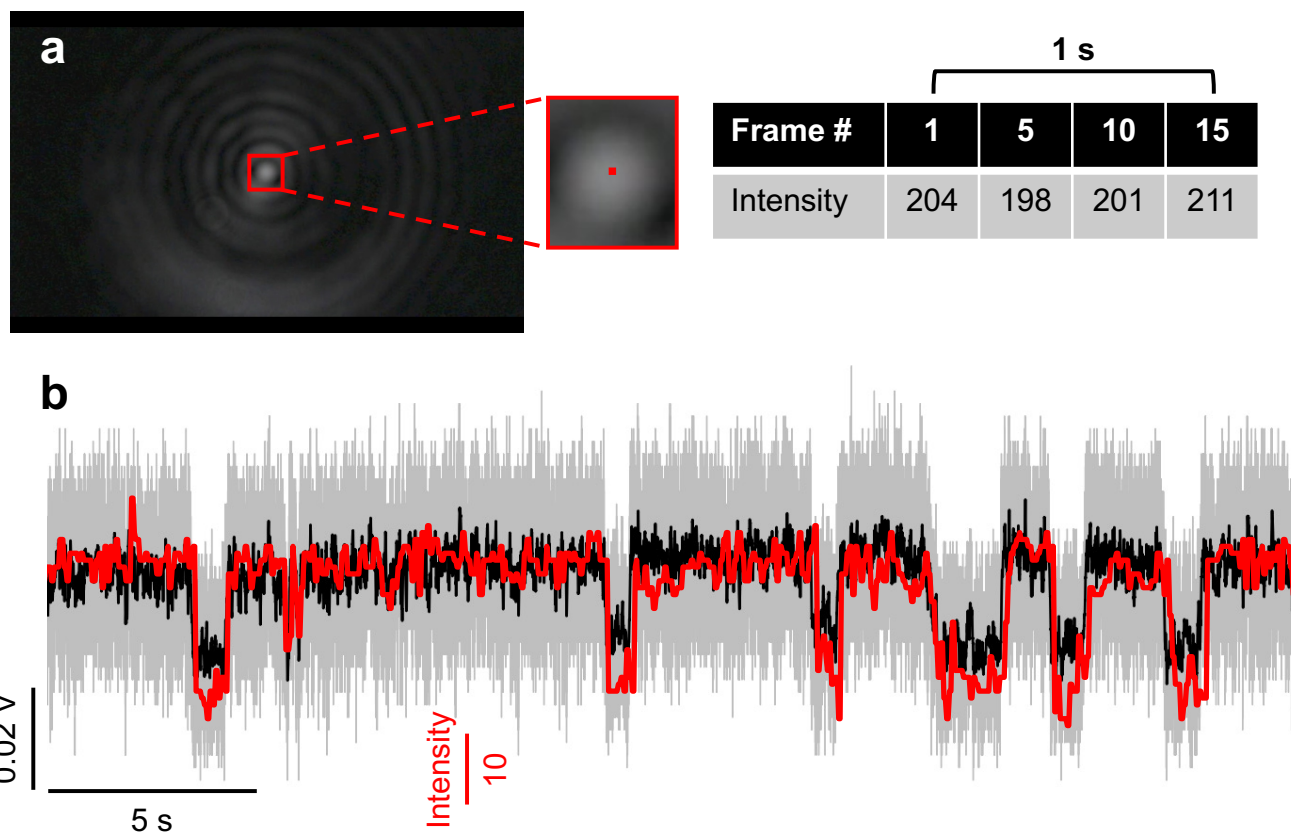

**Figure SI-7.** (a) Typical frame of a video recorded during trapping. Highlighted region shows the centre lobe of the diffraction pattern and single pixel intensity tracking. (b) Overlay of synced avalanche photodiode measurement at 100 kHz and pixel intensity at 15 Hz.

## 6 State recognition

A step-by-step process for the state recognition algorithm is shown in Fig. [SI-8](#).



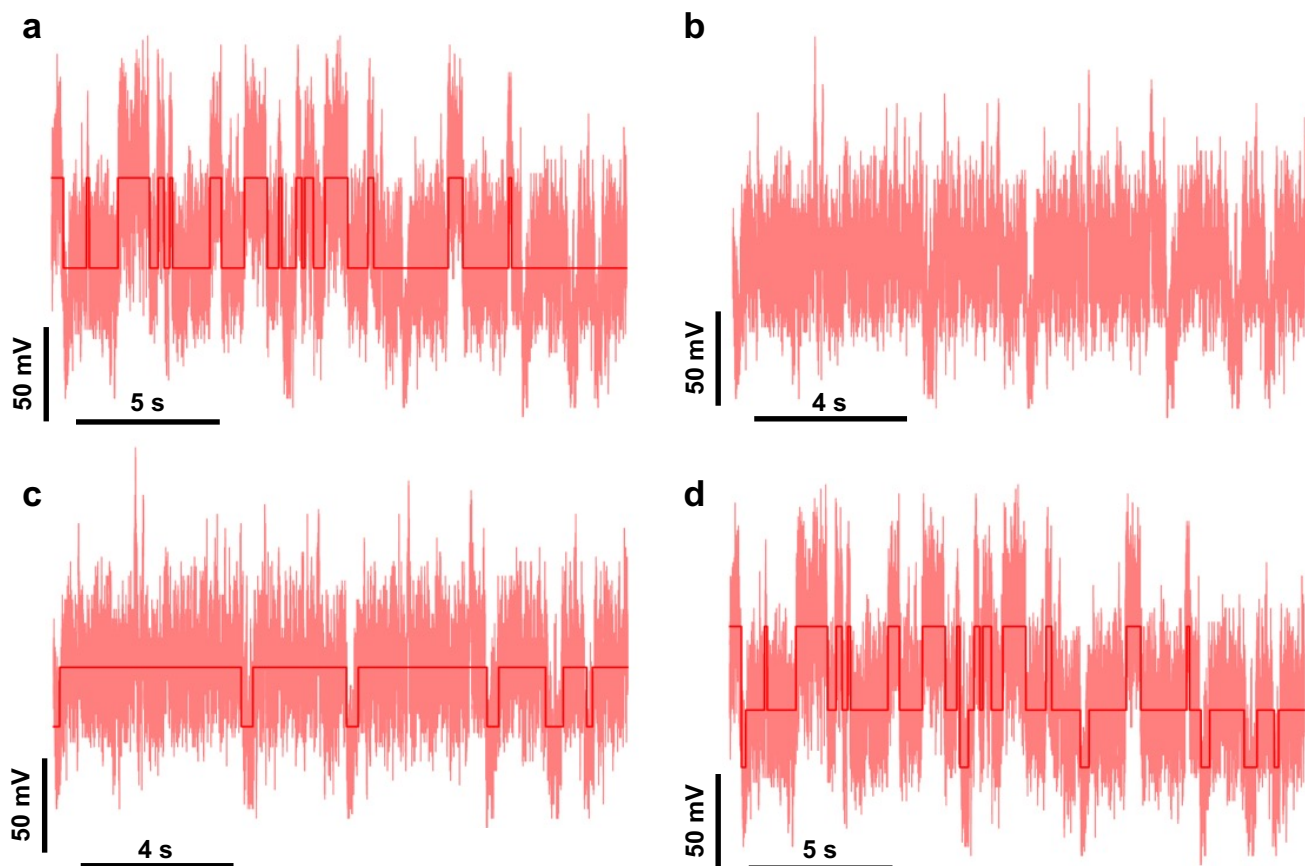

**Figure SI-8.** (a)Two state recognition on a three state system using k-means state recognition. (b) Removal of upper state. (c) Two state recognition on lower and middle state. (d) Recombination time series and state recognition.
